# Supplementary material
Source: HighWire-hosted journal article supplement (doi:10.1101/rna.067694.118)
Supplement: Supplemental_Table_S1.xlsx [file Supplemental_Table_S1.xlsx]

## Sheet: Table S1
PeakID (cmd=annotatePeaks.pl ../W.mismatch.merge.fold_sub.cand.bed hg19 -gtf /lustre1/chengqiyi_pkuhpc/xiongxs/Genome_data/human/refseq_0906/hg19_refseq_gene.gtf)	Chr	Start	End	Strand	Peak Score	Focus Ratio/Region Size	Annotation	Detailed Annotation	Distance to TSS	Nearest PromoterID	Entrez ID	Nearest Unigene	Nearest Refseq	Nearest Ensembl	Gene Name	Gene Alias	Gene Description	Gene Type
chr6_26988203_fwd	chr6	26988204	26988203	+	0	NA	promoter-TSS (NR_026776)	promoter-TSS (NR_026776)	-118	NR_026776	100270746	Hs.590428	NR_026776		LOC100270746	-	uncharacterized LOC100270746	ncRNA
chr16_87903113_rvs	chr16	87903114	87903113	-	0	NA	promoter-TSS (NM_003486)	promoter-TSS (NM_003486)	-13	NM_003486	8140	Hs.513797	NM_003486	ENSG00000103257	SLC7A5	4F2LC|CD98|D16S469E|E16|LAT1|MPE16|hLAT1	solute carrier family 7 (amino acid transporter light chain, L system), member 5	protein-coding
chr15_45493405_fwd	chr15	45493406	45493405	+	0	NA	promoter-TSS (NM_138356)	promoter-TSS (NM_138356)	-32	NM_138356	90525	Hs.310399	NM_138356	ENSG00000138606	SHF	-	Src homology 2 domain containing F	protein-coding
chr6_10415498_rvs	chr6	10415499	10415498	-	0	NA	promoter-TSS (NM_003220)	promoter-TSS (NM_003220)	-28	NM_003220	7020	Hs.519880	NM_003220	ENSG00000137203	TFAP2A	AP-2|AP-2alpha|AP2TF|BOFS|TFAP2	transcription factor AP-2 alpha (activating enhancer binding protein 2 alpha)	protein-coding
chr3_45730506_rvs	chr3	45730507	45730506	-	0	NA	promoter-TSS (NM_014016)	promoter-TSS (NM_014016)	-132	NR_033947	644714	Hs.712889	NR_033947		LIMD1-AS1	-	LIMD1 antisense RNA 1	ncRNA
chr19_36001414_rvs	chr19	36001415	36001414	-	0	NA	promoter-TSS (NM_001126059)	promoter-TSS (NM_001126059)	-2	NR_033746	93099	Hs.417795	NM_033317	ENSG00000161249	DMKN	UNQ729|ZD52F10	dermokine	protein-coding
chr6_cox_hap2_430148_rvs	chr6_cox_hap2	430149	430148	-	0	NA	promoter-TSS (NR_103538-HOMER3)	promoter-TSS (NR_103538).6	-147	NR_103538	729583	Hs.453549	NR_103538		LINC01556	C6orf100|dJ25J6.5	long intergenic non-protein coding RNA 1556	ncRNA
chr11_17099262_rvs	chr11	17099263	17099262	-	0	NA	promoter-TSS (NM_001017)	promoter-TSS (NM_001017)	-42	NM_001017	6207	Hs.446588	NM_001017	ENSG00000110700	RPS13	S13	ribosomal protein S13	protein-coding
chr16_22308527_fwd	chr16	22308528	22308527	+	0	NA	promoter-TSS (NM_001258035)	promoter-TSS (NR_047581)	-169	NM_001258034	55718	Hs.460298	NM_018119	ENSG00000058600	POLR3E	RPC5|SIN	polymerase (RNA) III (DNA directed) polypeptide E (80kD)	protein-coding
chr17_27224751_rvs	chr17	27224752	27224751	-	0	NA	promoter-TSS (NM_004475)	promoter-TSS (NM_004475)	-36	NM_004475	2319	Hs.514038	NM_004475	ENSG00000132589	FLOT2	ECS-1|ECS1|ESA|ESA1|M17S1	flotillin 2	protein-coding
chr6_44095196_rvs	chr6	44095197	44095196	-	0	NA	promoter-TSS (NM_018426)	promoter-TSS (NM_018426)	-5	NM_032111	64928	Hs.311190	NM_032111	ENSG00000180992	MRPL14	L14mt|L32mt|MRP-L14|MRP-L32|MRPL32|RMPL32|RPML32	mitochondrial ribosomal protein L14	protein-coding
chr12_58148848_fwd	chr12	58148849	58148848	+	0	NA	promoter-TSS (NM_138396)	promoter-TSS (NM_138396)	-33	NM_138396	92979	Hs.632709	NM_138396	ENSG00000139266	2018-03-09	MARCH-IX|RNF179	membrane associated ring finger 9	protein-coding
chr7_75115576_rvs	chr7	75115577	75115576	-	0	NA	promoter-TSS (NM_001099415)	promoter-TSS (NM_001099415)	-11	NM_001099415	100101267	Hs.712563	NM_001099415	ENSG00000272391	POM121C	POM121-2	POM121 transmembrane nucleoporin C	protein-coding
chrX_54466835_fwd	chrX	54466836	54466835	+	0	NA	promoter-TSS (NM_058163)	promoter-TSS (NM_058163)	-18	NM_058163	90121	Hs.522662	NM_058163	ENSG00000158526	TSR2	DBA14|DT1P1A10|WGG1	TSR2, 20S rRNA accumulation, homolog (S. cerevisiae)	protein-coding
chr6_86353048_rvs	chr6	86353049	86353048	-	0	NA	promoter-TSS (NM_006372)	promoter-TSS (NM_001253771)	-5	NM_006372	10492	Hs.571177	NM_006372	ENSG00000135316	SYNCRIP	GRY-RBP|GRYRBP|HNRNPQ|HNRPQ1|NSAP1|PP68|hnRNP-Q	synaptotagmin binding, cytoplasmic RNA interacting protein	protein-coding
chr6_33239843_fwd	chr6	33239844	33239843	+	0	NA	promoter-TSS (NM_022553-HOMER2)	promoter-TSS (NM_022551).3	-9	NM_022551	6222	Hs.448854	NM_022551	ENSG00000231500	RPS18	D6S218E|HKE3|KE-3|KE3|S18	ribosomal protein S18	protein-coding
chr1_149287374_rvs	chr1	149287375	149287374	-	0	NA	promoter-TSS (NR_111934)	non-coding (NR_027002, exon 1 of 1)	-77	NR_111934	644634	Hs.723057	NR_111934		FAM231D	-	family with sequence similarity 231, member D	ncRNA
chr6_mann_hap4_214819_rvs	chr6_mann_hap4	214820	214819	-	0	NA	promoter-TSS (NR_103538-HOMER4)	promoter-TSS (NR_103538)	-147	NR_103538	729583	Hs.453549	NR_103538		LINC01556	C6orf100|dJ25J6.5	long intergenic non-protein coding RNA 1556	ncRNA
chr6_17707156_rvs	chr6	17707157	17707156	-	0	NA	promoter-TSS (NM_001278210)	promoter-TSS (NM_005124)	-91	NM_001278210	9972	Hs.601591	NM_005124	ENSG00000124789	NUP153	HNUP153|N153	nucleoporin 153kDa	protein-coding
chrX_14891191_rvs	chrX	14891192	14891191	-	0	NA	promoter-TSS (NM_152633)	promoter-TSS (NM_152633)	-7	NM_152633	2187	Hs.554740	NM_152633	ENSG00000181544	FANCB	FA2|FAAP90|FAAP95|FAB|FACB	Fanconi anemia complementation group B	protein-coding
chrX_112084059_rvs	chrX	112084060	112084059	-	0	NA	promoter-TSS (NM_133265)	promoter-TSS (NM_133265)	-16	NM_133265	154796	Hs.528051	NM_133265	ENSG00000126016	AMOT	-	angiomotin	protein-coding
chr6_43597001_rvs	chr6	43597002	43597001	-	0	NA	promoter-TSS (NM_001003690)	promoter-TSS (NM_019096)	-18	NM_019096	54676	Hs.485449	NM_019096	ENSG00000172432	GTPBP2	-	GTP binding protein 2	protein-coding
chr11_70116796_fwd	chr11	70116797	70116796	+	0	NA	promoter-TSS (NM_003626)	promoter-TSS (NM_003626)	-10	NR_045286	8500	Hs.530749	NM_003626	ENSG00000131626	PPFIA1	LIP.1|LIP1|LIPRIN	protein tyrosine phosphatase, receptor type, f polypeptide (PTPRF), interacting protein (liprin), alpha 1	protein-coding
chr19_55629005_rvs	chr19	55629006	55629005	-	0	NA	promoter-TSS (NM_017607)	promoter-TSS (NM_001271618)	-37	NM_001271618	54776	Hs.631579	NM_017607	ENSG00000125503	PPP1R12C	LENG3|MBS85|p84|p85	protein phosphatase 1, regulatory subunit 12C	protein-coding
chr14_21152231_fwd	chr14	21152232	21152231	+	0	NA	promoter-TSS (NM_001282193)	promoter-TSS (NM_001282192)	-105	NM_001145	283	Hs.283749	NM_001145	ENSG00000214274	ANG	ALS9|HEL168|RAA1|RNASE4|RNASE5	angiogenin, ribonuclease, RNase A family, 5	protein-coding
chr7_150065710_fwd	chr7	150065711	150065710	+	0	NA	promoter-TSS (NM_001099695)	promoter-TSS (NM_001099696)	-169	NM_001099696	29803	Hs.647086	NM_013400	ENSG00000214022	REPIN1	AP4|RIP60|ZNF464|Zfp464	replication initiator 1	protein-coding
chr6_ssto_hap7_252331_rvs	chr6_ssto_hap7	252332	252331	-	0	NA	promoter-TSS (NR_103538)	promoter-TSS (NR_103538).4	-147	NR_103538	729583	Hs.453549	NR_103538		LINC01556	C6orf100|dJ25J6.5	long intergenic non-protein coding RNA 1556	ncRNA
chr17_81037485_fwd	chr17	81037486	81037485	+	0	NA	promoter-TSS (NM_001004431)	promoter-TSS (NM_001004431)	-82	NM_001004431	284207	Hs.378821	NM_001004431	ENSG00000176845	METRNL	-	meteorin, glial cell differentiation regulator-like	protein-coding
chr19_38146366_rvs	chr19	38146367	38146366	-	0	NA	promoter-TSS (NM_014898)	promoter-TSS (NM_014898)	-53	NM_014898	22835	Hs.716719	NM_014898	ENSG00000120784	ZFP30	ZNF745	ZFP30 zinc finger protein	protein-coding
chr11_73587917_rvs	chr11	73587918	73587917	-	0	NA	promoter-TSS (NM_001267804)	promoter-TSS (NM_016565)	-27	NM_016565	51287	Hs.475387	NM_016565	ENSG00000181924	COA4	CHCHD8|CMC3|E2IG2	cytochrome c oxidase assembly factor 4 homolog	protein-coding
chr22_42372782_fwd	chr22	42372783	42372782	+	0	NA	promoter-TSS (NM_145733)	promoter-TSS (NM_019106)	-149	NM_019106	55964	Hs.120483	NM_019106	ENSG00000100167	2018-09-03	SEP3|bK250D10.3	septin 3	protein-coding
chr1_111991878_rvs	chr1	111991879	111991878	-	0	NA	promoter-TSS (NM_024102)	promoter-TSS (NM_024102)	-48	NM_024102	79084	Hs.204773	NM_024102	ENSG00000116455	WDR77	HKMT1069|MEP-50|MEP50|Nbla10071|p44|p44/Mep50	WD repeat domain 77	protein-coding
chr17_8924827_fwd	chr17	8924828	8924827	+	0	NA	promoter-TSS (NM_004822)	promoter-TSS (NM_004822)	-32	NM_004822	9423	Hs.660885	NM_004822	ENSG00000065320	NTN1	NTN1L	netrin 1	protein-coding
chr6_qbl_hap6_214814_rvs	chr6_qbl_hap6	214815	214814	-	0	NA	promoter-TSS (NR_103538-HOMER6)	promoter-TSS (NR_103538).3	-147	NR_103538	729583	Hs.453549	NR_103538		LINC01556	C6orf100|dJ25J6.5	long intergenic non-protein coding RNA 1556	ncRNA
chr6_3259128_fwd	chr6	3259129	3259128	+	0	NA	promoter-TSS (NM_001128592)	promoter-TSS (NM_001128591)	-34	NM_001128591	389362	Hs.207069	NM_001128591	ENSG00000180822	PSMG4	C6orf86|PAC4|bA506K6.2	proteasome (prosome, macropain) assembly chaperone 4	protein-coding
chr2_32390808_rvs	chr2	32390809	32390808	-	0	NA	promoter-TSS (NM_001193513)	promoter-TSS (NM_017964)	-102	NM_001193515	55676	Hs.23248	NM_017964	ENSG00000152683	SLC30A6	MST103|MSTP103|ZNT6	solute carrier family 30 (zinc transporter), member 6	protein-coding
chr3_9773419_fwd	chr3	9773420	9773419	+	0	NA	promoter-TSS (NM_004634)	promoter-TSS (NM_004634)	-15	NM_001003694	7862	Hs.1004	NM_004634	ENSG00000156983	BRPF1	BR140	bromodomain and PHD finger containing 1	protein-coding
chr6_mcf_hap5_214977_rvs	chr6_mcf_hap5	214978	214977	-	0	NA	promoter-TSS (NR_103538-HOMER5)	promoter-TSS (NR_103538).2	-147	NR_103538	729583	Hs.453549	NR_103538		LINC01556	C6orf100|dJ25J6.5	long intergenic non-protein coding RNA 1556	ncRNA
chr19_50370833_rvs	chr19	50370834	50370833	-	0	NA	promoter-TSS (NM_007254)	promoter-TSS (NM_007254)	-11	NM_007254	11284	Hs.78016	NM_007254	ENSG00000039650	PNKP	AOA4|EIEE10|MCSZ|PNK	polynucleotide kinase 3'-phosphatase	protein-coding
chr17_17495022_rvs	chr17	17495023	17495022	-	0	NA	promoter-TSS (NM_001267551)	promoter-TSS (NM_148172)	-5	NM_001267551	10400	Hs.714193	NM_007169	ENSG00000133027	PEMT	PEAMT|PEMPT|PEMT2|PNMT	phosphatidylethanolamine N-methyltransferase	protein-coding
chr17_7486890_rvs	chr17	7486891	7486890	-	0	NA	promoter-TSS (NR_024603)	promoter-TSS (NM_004870)	-75	NR_024603	9526	Hs.246381	NM_004870	ENSG00000129255	MPDU1	CDGIF|HBEBP2BPA|Lec35|My008|PP3958|PQLC5|SL15	mannose-P-dolichol utilization defect 1	protein-coding
chr17_1733268_fwd	chr17	1733269	1733268	+	0	NA	promoter-TSS (NM_002945)	promoter-TSS (NM_002945)	-5	NM_002945	6117	Hs.461925	NM_002945	ENSG00000132383	RPA1	HSSB|MST075|REPA1|RF-A|RP-A|RPA70	replication protein A1	protein-coding
chr17_45056619_rvs	chr17	45056620	45056619	-	0	NA	promoter-TSS (NM_203400)	promoter-TSS (NM_203400)	-5	NM_203400	388394	Hs.367999	NM_203400	ENSG00000179673	RPRML	-	reprimo-like	protein-coding
chr13_44453876_rvs	chr13	44453877	44453876	-	0	NA	promoter-TSS (NM_144974)	promoter-TSS (NM_144974)	-50	NM_144974	160857	Hs.170849	NM_144974	ENSG00000151773	CCDC122	-	coiled-coil domain containing 122	protein-coding
chrX_47518581_rvs	chrX	47518582	47518581	-	0	NA	promoter-TSS (NM_004182)	promoter-TSS (NM_004182)	-2	NM_004182	8409	Hs.172791	NM_004182	ENSG00000126756	UXT	ART-27|STAP1	ubiquitously expressed prefoldin like chaperone	protein-coding
chr6_ssto_hap7_4720045_fwd	chr6_ssto_hap7	4720046	4720045	+	0	NA	promoter-TSS (NM_001289175)	promoter-TSS (NM_022551).2	-9	NM_022551	6222	Hs.448854	NM_022551	ENSG00000231500	RPS18	D6S218E|HKE3|KE-3|KE3|S18	ribosomal protein S18	protein-coding
chrX_24712038_fwd	chrX	24712039	24712038	+	0	NA	promoter-TSS (NM_016937)	promoter-TSS (NM_016937)	-26	NM_016937	5422	Hs.567319	NM_016937	ENSG00000101868	POLA1	NSX|POLA|p180	polymerase (DNA directed), alpha 1, catalytic subunit	protein-coding
chr11_116658742_rvs	chr11	116658743	116658742	-	0	NA	promoter-TSS (NM_003904)	promoter-TSS (NM_003904)	-3	NM_003904	8882	Hs.7165	NM_003904		ZPR1	ZNF259	ZPR1 zinc finger	protein-coding
chr1_159895333_rvs	chr1	159895334	159895333	-	0	NA	promoter-TSS (NM_001277223)	promoter-TSS (NM_003564)	-1	NM_003564	8407	Hs.517168	NM_003564	ENSG00000158710	TAGLN2	HA1756	transgelin 2	protein-coding
chr2_32264874_rvs	chr2	32264875	32264874	-	0	NA	promoter-TSS (NM_032574)	promoter-TSS (NM_032574)	-30	NM_032574	84661	Hs.531788	NM_032574	ENSG00000162961	DPY30	Cps25|HDPY-30|Saf19	dpy-30 histone methyltransferase complex regulatory subunit	protein-coding
chr6_28911414_rvs	chr6	28911415	28911414	-	0	NA	promoter-TSS (NR_103538-HOMER2)	promoter-TSS (NR_103538).5	-147	NR_103538	729583	Hs.453549	NR_103538		LINC01556	C6orf100|dJ25J6.5	long intergenic non-protein coding RNA 1556	ncRNA
chr19_13229101_fwd	chr19	13229102	13229101	+	0	NA	promoter-TSS (NM_052876)	promoter-TSS (NM_052876)	-1	NM_052876	112939	Hs.531614	NM_052876	ENSG00000160877	NACC1	BEND8|BTBD14B|BTBD30|NAC-1|NAC1	nucleus accumbens associated 1, BEN and BTB (POZ) domain containing	protein-coding
chr1_39325574_fwd	chr1	39325575	39325574	+	0	NA	promoter-TSS (NM_001271851)	promoter-TSS (NM_022157)	-79	NM_001271851	64121	Hs.532461	NM_022157	ENSG00000116954	RRAGC	GTR2|RAGC|TIB929	Ras-related GTP binding C	protein-coding
chr16_30798526_rvs	chr16	30798527	30798526	-	0	NA	promoter-TSS (NM_001080417)	promoter-TSS (NM_001080417)	-3	NM_001080417	23361	Hs.301094	NM_001080417	ENSG00000102870	ZNF629	ZNF|ZNF65	zinc finger protein 629	protein-coding
chr19_14228574_rvs	chr19	14228575	14228574	-	0	NA	promoter-TSS (NM_002730)	promoter-TSS (NM_002730)	-15	NM_002730	5566	Hs.631630	NM_002730	ENSG00000072062	PRKACA	PKACA|PPNAD4	protein kinase, cAMP-dependent, catalytic, alpha	protein-coding
chr20_57226291_fwd	chr20	57226292	57226291	+	0	NA	promoter-TSS (NR_037942)	promoter-TSS (NM_001204868)	-18	NR_037943	8675	Hs.307913	NM_003763	ENSG00000124222	STX16	SYN16	syntaxin 16	protein-coding
chr9_95301675_fwd	chr9	95301676	95301675	+	0	NA	intron (NM_001012267, intron 5 of 7)	intron (NM_001012267, intron 5 of 7)	-3301	NM_001393	1842	Hs.117060	NM_001393	ENSG00000106823	ECM2	-	extracellular matrix protein 2, female organ and adipocyte specific	protein-coding
chr16_1502069_rvs	chr16	1502070	1502069	-	0	NA	intron (NM_001287, intron 15 of 24)	intron (NM_001287, intron 15 of 24)	-7579	NM_001143980	645811	Hs.355232	NM_001143980	ENSG00000197599	CCDC154	C16orf29	coiled-coil domain containing 154	protein-coding
chr11_103280398_rvs	chr11	103280399	103280398	-	0	NA	intron (NM_001377, intron 84 of 88)	intron (NM_001080463, intron 85 of 89)	300238	NM_001080463	79659	Hs.503721	NM_001377	ENSG00000187240	DYNC2H1	ATD3|DHC1b|DHC2|DNCH2|DYH1B|SRPS2B|SRTD3|hdhc11	dynein, cytoplasmic 2, heavy chain 1	protein-coding
chr5_93905232_rvs	chr5	93905233	93905232	-	0	NA	intron (NM_173665, intron 2 of 4)	intron (NM_001145678, intron 2 of 20)	49077	NM_173665	285600	Hs.425123	NM_173665	ENSG00000185261	KIAA0825	C5orf36	KIAA0825	protein-coding
chr4_129002906_rvs	chr4	129002907	129002906	-	0	NA	intron (NM_001278604, intron 4 of 9)	intron (NM_001278604, intron 4 of 9)	20485	NM_178043	55132	Hs.657067	NM_018078	ENSG00000138709	LARP1B	LARP2	La ribonucleoprotein domain family, member 1B	protein-coding
chr19_50145765_fwd	chr19	50145766	50145765	+	0	NA	intron (NM_021228, intron 1 of 10)	intron (NM_021228, intron 1 of 10)	383	NM_021228	58506	Hs.103521	NM_021228	ENSG00000126461	SCAF1	SRA1	SR-related CTD-associated factor 1	protein-coding
chr18_45379682_rvs	chr18	45379683	45379682	-	0	NA	intron (NM_001003652, intron 6 of 10)	intron (NM_001003652, intron 6 of 10)	77288	NM_005901	4087	Hs.12253	NM_005901	ENSG00000175387	SMAD2	JV18|JV18-1|MADH2|MADR2|hMAD-2|hSMAD	SMAD family member 2	protein-coding
chr11_103280428_rvs	chr11	103280429	103280428	-	0	NA	intron (NM_001377, intron 84 of 88)	intron (NM_001080463, intron 85 of 89)	300268	NM_001080463	79659	Hs.503721	NM_001377	ENSG00000187240	DYNC2H1	ATD3|DHC1b|DHC2|DNCH2|DYH1B|SRPS2B|SRTD3|hdhc11	dynein, cytoplasmic 2, heavy chain 1	protein-coding
chr20_62325333_fwd	chr20	62325334	62325333	+	0	NA	intron (NM_001283009, intron 30 of 34)	intron (NR_037882, intron 30 of 37)	-2671	NM_003823	8771	Hs.434878	NM_003823	ENSG00000243509	TNFRSF6B	DCR3|DJ583P15.1.1|M68|M68E|TR6	tumor necrosis factor receptor superfamily, member 6b, decoy	protein-coding
chr8_99153515_fwd	chr8	99153516	99153515	+	0	NA	intron (NM_001145861, intron 11 of 15)	intron (NM_001145861, intron 11 of 15)	23447	NM_015029	10940	Hs.252828	NM_015029	ENSG00000104356	POP1	-	POP1 homolog, ribonuclease P/MRP subunit	protein-coding
chr3_40294253_fwd	chr3	40294254	40294253	+	0	NA	intron (NM_001284425, intron 15 of 15)	intron (NR_104316, intron 16 of 16)	-56920	NM_005875	10289	Hs.315230	NM_005875	ENSG00000114784	EIF1B	GC20	eukaryotic translation initiation factor 1B	protein-coding
chr17_34856528_rvs	chr17	34856529	34856528	-	0	NA	intron (NM_025109, intron 20 of 22)	intron (NM_025109, intron 20 of 22)	14057	NR_104009	9326	Hs.2210	NM_004773	ENSG00000273611	ZNHIT3	TRIP3	zinc finger, HIT-type containing 3	protein-coding
chr9_5092822_fwd	chr9	5092823	5092822	+	0	NA	intron (NM_004972, intron 22 of 24)	intron (NM_004972, intron 22 of 24)	92796	NM_007179	11172	Hs.632648	NM_007179	ENSG00000120210	INSL6	RIF1	insulin-like 6	protein-coding
chr2_46036323_rvs	chr2	46036324	46036323	-	0	NA	intron (NM_005400, intron 1 of 14)	intron (NM_005400, intron 1 of 14)	157280	NM_005400	5581	Hs.580351	NM_005400	ENSG00000171132	PRKCE	PKCE|nPKC-epsilon	protein kinase C, epsilon	protein-coding
chr16_54956932_rvs	chr16	54956933	54956932	-	0	NA	intron (NR_034105, intron 3 of 4)	intron (NR_034105, intron 3 of 4)	5758	NR_034106	643911	Hs.237396	NM_001308963		CRNDE	CRNDEP|LINC00180|NCRNA00180|PNAS-108|lincIRX5	colorectal neoplasia differentially expressed (non-protein coding)	protein-coding
chr14_32954260_fwd	chr14	32954261	32954260	+	0	NA	intron (NM_004274, intron 2 of 13)	intron (NM_004274, intron 2 of 13)	155781	NM_004274	9472	Hs.509083	NM_004274		AKAP6	ADAP100|ADAP6|AKAP100|PRKA6|mAKAP	A kinase (PRKA) anchor protein 6	protein-coding
chr9_5096474_rvs	chr9	5096475	5096474	-	0	NA	intron (NM_004972, intron 22 of 24)	intron (NM_004972, intron 22 of 24)	89144	NM_007179	11172	Hs.632648	NM_007179	ENSG00000120210	INSL6	RIF1	insulin-like 6	protein-coding
chr18_45379685_rvs	chr18	45379686	45379685	-	0	NA	intron (NM_001003652, intron 6 of 10)	intron (NM_001003652, intron 6 of 10)	77285	NM_005901	4087	Hs.12253	NM_005901	ENSG00000175387	SMAD2	JV18|JV18-1|MADH2|MADR2|hMAD-2|hSMAD	SMAD family member 2	protein-coding
